# Supplementary material for: mRNA BNT162b Vaccine Elicited Higher Antibody and CD4+ T-Cell Responses than Patients with Mild COVID-19
Source: MDPI journal article supplement (doi:10.3390/microorganisms10061250), 2022-06-18
Supplement: s1 [file s1]

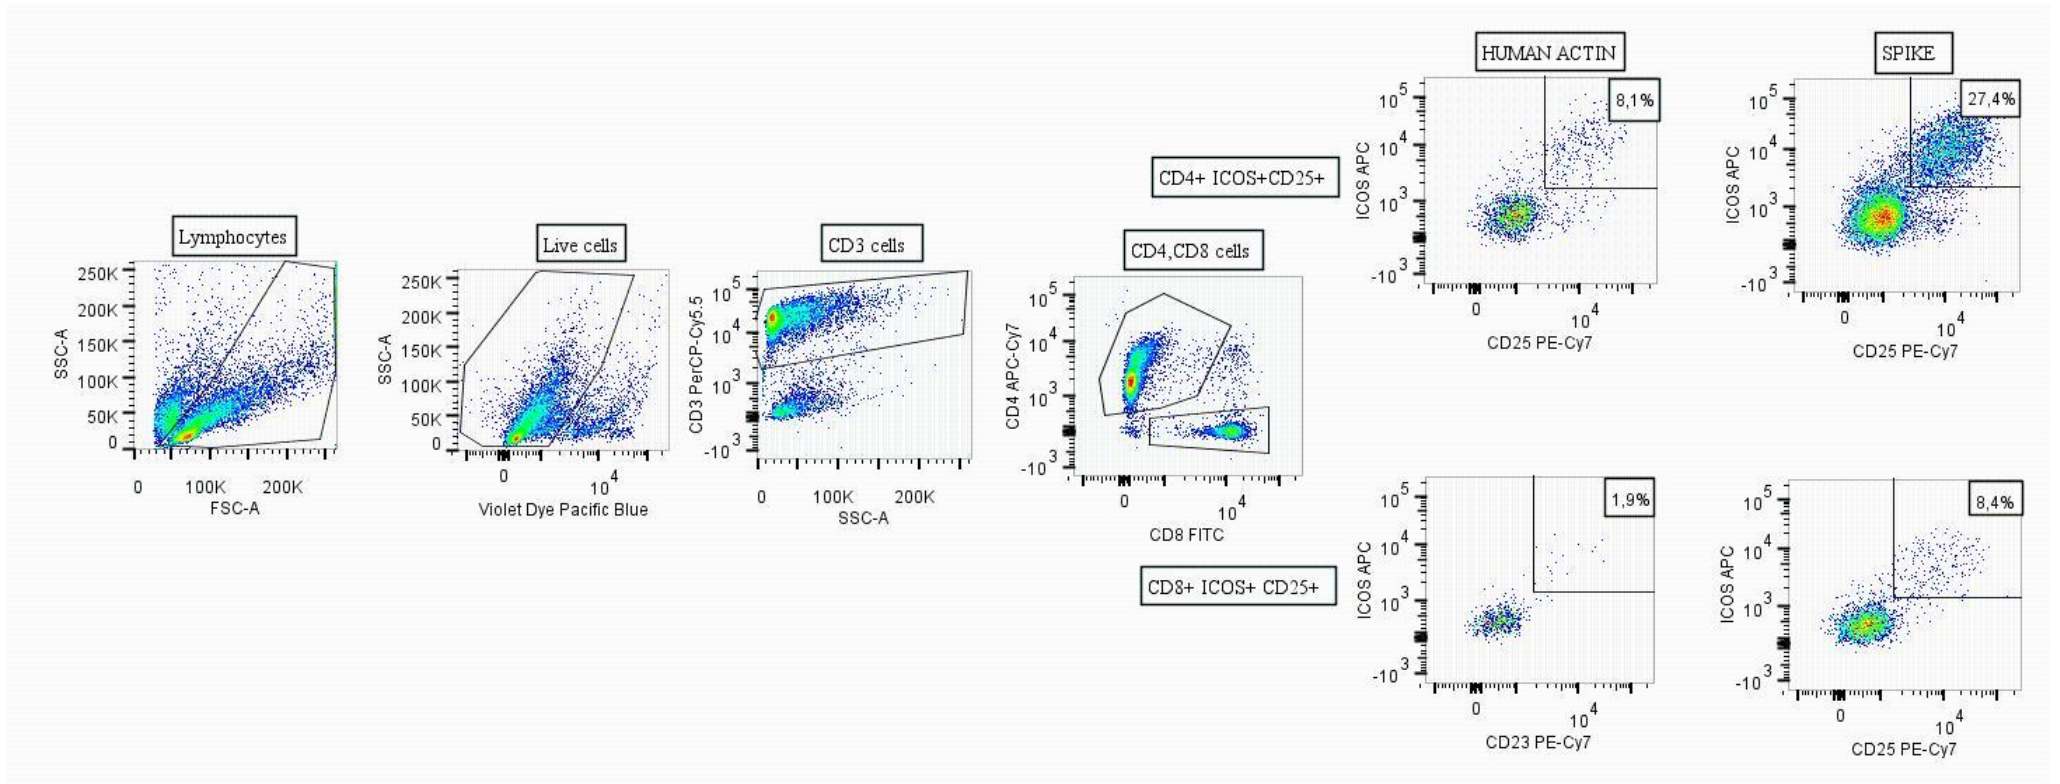

**Supplementary Figure S1.** Lymphoproliferation Phenotyping Flow Cytometry. Facs plot example on antigen-specific memory CD4<sup>+</sup> and CD8<sup>+</sup> T-cells from PBMC of vaccinated patient after stimulation with Spike and Human actin peptide pools. Antigen-specific T-cells were defined as CD4<sup>+</sup> ICOS APC<sup>+</sup> CD25 PECy7<sup>+</sup> and CD8<sup>+</sup> ICOS APC<sup>+</sup> CD25 PECy7<sup>+</sup>.
